# Supplementary material
Source: Springer Nature journal article supplement (https://repositorio.tec.mx/bitstream/handle/11285/613677/12952_2006_45_MOESM4_ESM.pdf)

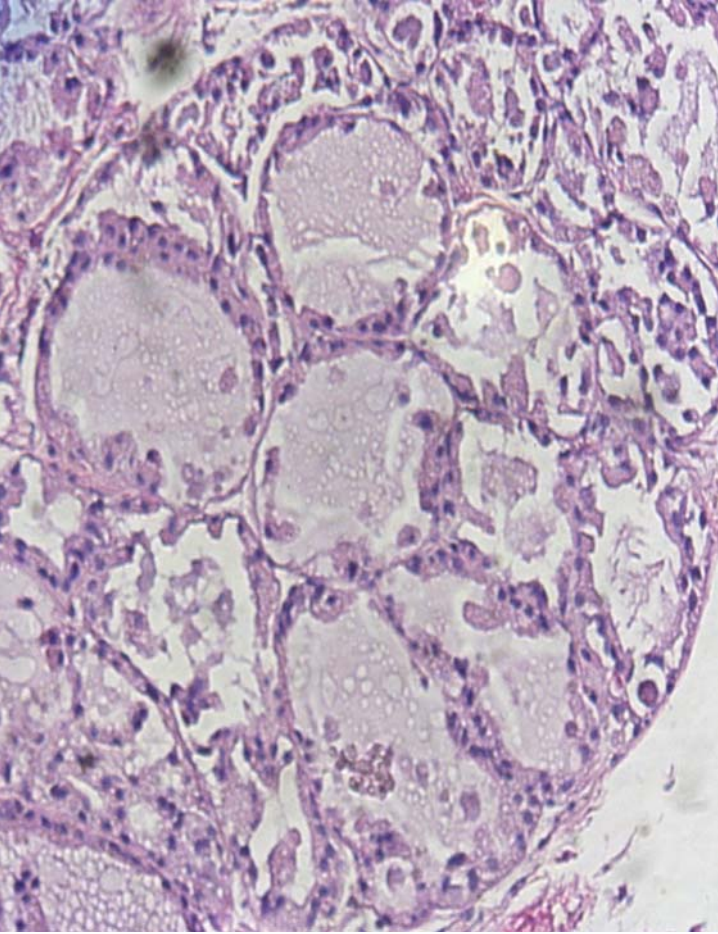

**A**

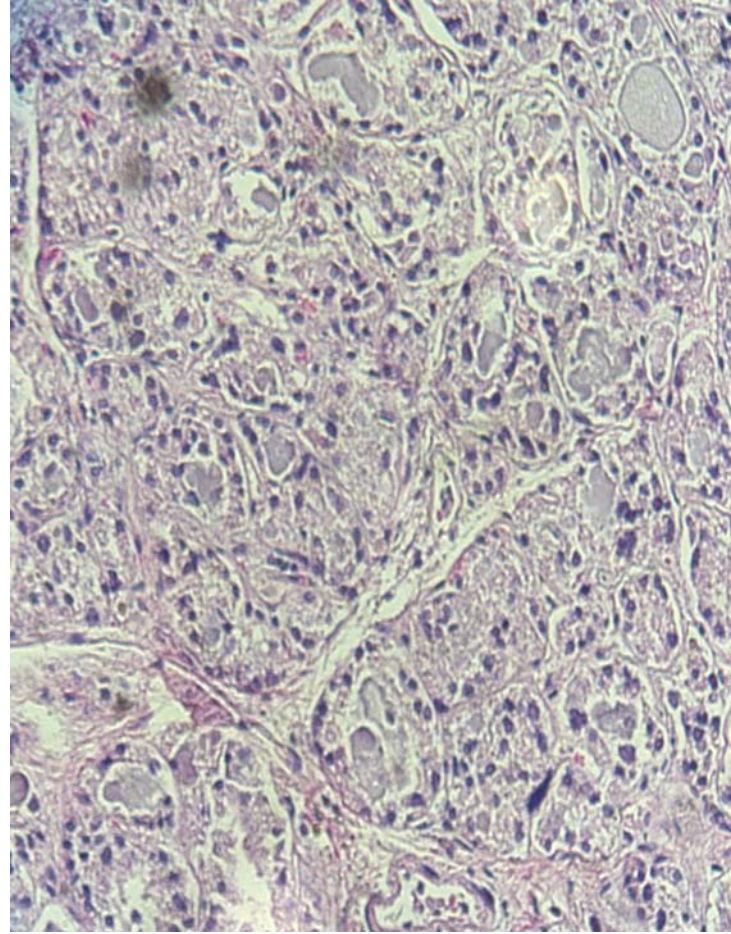

**B**

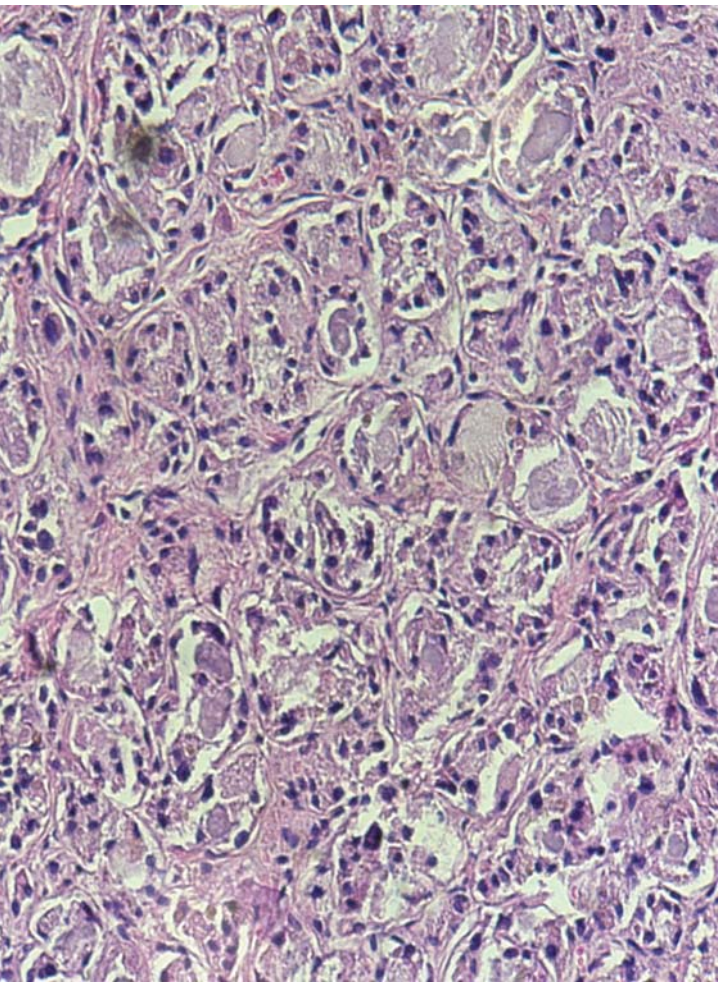

**C**

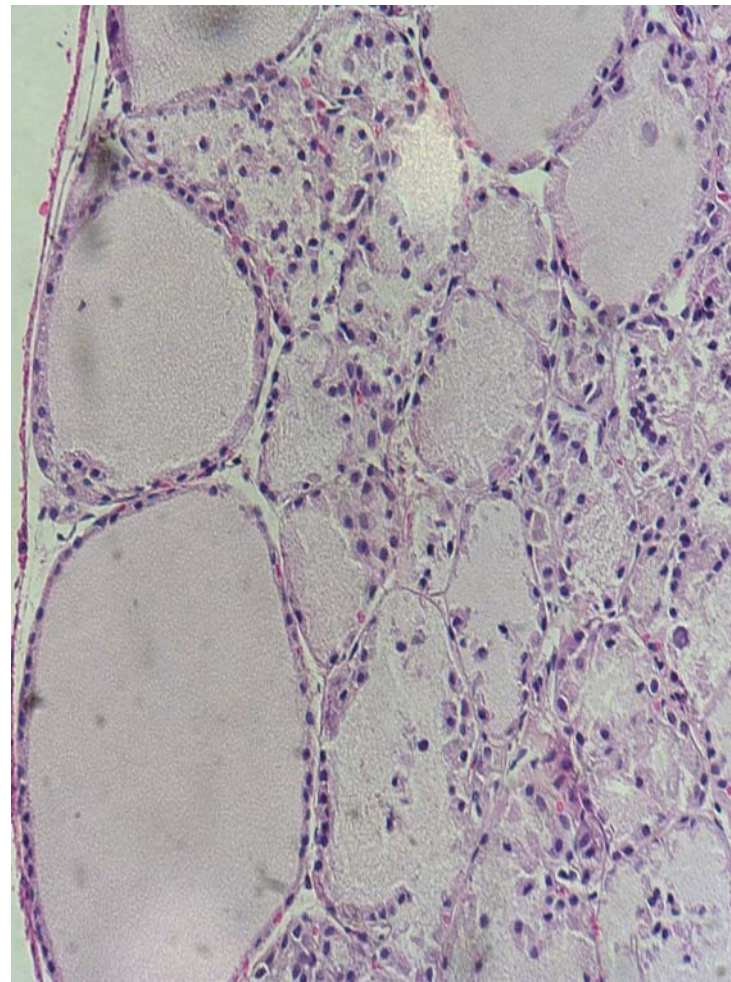

**D**

Supplement: MOESM4 [file 12952_2006_45_MOESM4_ESM.pdf]
